# Supplementary material
Source: publisher site journal article supplement (https://www.dovepress.com/article/527018)
Supplement: Supplementary file 1 [file 527018%20Revised%20Supplementary%20Tables%20and%20Figures.docx]

**Supplementary information**

**Table S1. Information of six institutions in this study**

| **Institutions** | **NO.of patients enrolled** | **No.of in-hospital deaths** | **in-hospital death rate (%)** |
| --- | --- | --- | --- |
| A | 1,655 | 27 | 1.63 |
| B | 318 | 8 | 2.52 |
| C | 12,116 | 457 | 3.77 |
| D | 1,072 | 29 | 2.71 |
| E | 844 | 12 | 1.42 |
| F | 1,416 | 23 | 1.62 |
| Total | 17,421 | 556 | 3.19 |

**Table S2. Top 10 primary diagnoses**

| **Primary Diagnosis** | **Number of cases** | **Proportion (%)** |
| --- | --- | --- |
| type 2 diabetes mellitus | 11,712 | 67.23 |
| type 2 diabetes with multiple complications | 1,479 | 8.49 |
| type 2 diabetic Retinopathy | 1,199 | 6.88 |
| type 2 diabetes peripheral neuropathy | 677 | 3.89 |
| type 2 diabetes nephropathy | 374 | 2.14 |
| binocular diabetes cataract | 137 | 0.79 |
| diabetic foot | 103 | 0.59 |
| hypoglycemic coma | 90 | 0.52 |
| hyperosmolar non-ketotic coma | 74 | 0.42 |
| type 2 diabetes diabetic ketoacidosis | 73 | 0.42 |
| others | 1,503 | 8.63 |

**Table S3. Baseline characteristics of patients in the external validation set**

| **Variables** | **External validation set (N=1416)** |
| --- | --- |
| **Demographics** |  |
| Age (years) | 74.47±7.06 |
| Gender (n, %) |  |
| female | 750(52.97) |
| male | 666(47.03) |
| History of surgery (n, %) |  |
| no | 658(46.47) |
| yes | 758(53.53) |
| Smoking history (n, %) |  |
| no | 941(66.45) |
| yes | 475(33.55) |
| Drinking history (n, %) |  |
| no | 1074(75.85) |
| yes | 342(24.15) |
| **Baseline clinical data** |  |
| CCI score (n, %) |  |
| <4 | 728(51.41) |
| ≥4 | 688(48.59) |
| Hypertension (n, %) |  |
| no | 432(30.51) |
| yes | 984(69.49) |
| CHD (n, %) |  |
| no | 989(69.84) |
| yes | 427(30.16) |
| CI (n, %) |  |
| no | 1,100(77.68) |
| yes | 316(22.32) |
| Hyperlipidemia (n, %) |  |
| no | 1,360(96.05) |
| yes | 56(3.95) |
| COPD (n, %) |  |
| no | 1,244(87.85) |
| yes | 172(12.15) |
| HF (n, %) |  |
| no | 1,250(88.28) |
| yes | 166(11.72) |
| SBP (mmHg) | 141.92±23.77 |
| DBP (mmHg) | 78.64±13.22 |
| TC (mmol/l) | 4.32±1.26 |
| TG (mmol/l) | 1.35(0.93,1.96) |
| SCR (umol/l) | 74.01(60.39,95.13) |
| LDL-C (mmol/L) | 2.49±0.93 |
| HDL-C (mmol/L) | 1.24±0.36 |
| ALB (g/L) | 39.98±5.38 |
| HbA1c (%) | 8.14±2.68 |
| Fasting glucose (mmol/l) | 8.30(6.66,11.76) |
| **Medications** |  |
| Nutritional support drug use (n, %) |  |
| no | 887(62.64) |
| yes | 529(37.36) |
| Statin drug use (n, %) |  |
| no | 655(46.26) |
| yes | 761(53.74) |
| Antiplatelet and anticoagulant drug use (n, %) |  |
| no | 550(38.84) |
| yes | 866(61.16) |
| Antiosteoporotic drug use (n, %) |  |
| no | 1,300(91.81) |
| yes | 116(8.19) |
| Antibiotic drug use (n, %) |  |
| no | 689(48.66) |
| yes | 727(51.34) |

*CCI: Charlson comorbidity index; CHD: coronary heart disease; CI: cerebral infarction; COPD: chronic obstructive pulmonary disease; HF: heart failure; SBP: systolic blood pressure; DBP: diastolic blood pressure; TC: total cholesterol; TG: triglycerides; SCR: serum levels of creatinine; LDL-C: low-density lipoprotein cholesterol; HDL-C: high-density lipoprotein cholesterol; ALB: albumin; HbA1c: glycated hemoglobin.*

**Table S4. Distributions of variables with missing data comparing observed complete case data to results from pooling the datasets with imputed variables from multiple imputation**

|  | **Missing variables** | **Number (%) with missing data** | **Complete case** | **Multiple imputation** |
| --- | --- | --- | --- | --- |
| **Training set** | SBP (mmHg) | 266(2.37) | 139.75±22.27 | 139.71±22.30 |
|  | DBP (mmHg) | 267(2.38) | 77.56±12.22 | 77.52±12.24 |
|  | TC (mmol/l) | 2,883(25.73) | 4.34±1.28 | 4.32±1.24 |
|  | TG (mmol/l) | 2,883(25.73) | 1.38(1.00,1.96) | 1.38(0.99,1.95) |
|  | SCR (umol/l) | 1,174(10.48) | 72.10(57.80,95.80) | 72.00(57.70,95.40) |
|  | LDL-C (mmol/L) | 2,958(26.40) | 2.40±0.95 | 2.39±0.93 |
|  | HDL-C (mmol/L) | 2,946(26.30) | 1.16±0.36 | 1.15±0.36 |
|  | ALB (g/L) | 1,347(12.02) | 38.33±5.18 | 38.33±5.18 |
|  | HbA1c (%) | 3,922(35.01) | 8.41±3.48 | 8.29±3.43 |
|  | Fasting glucose (mmol/l) | 1,887(16.84) | 8.05(6.18,11.32) | 8.00(6.14,11.30) |
| **Internal validation set** | SBP (mmHg) | 122(2.54) | 139.49±21.38 | 139.44±21.41 |
|  | DBP (mmHg) | 120(2.50) | 77.68±12.1 | 77.71±12.13 |
|  | TC (mmol/l) | 1,143(23.80) | 4.33±1.22 | 4.31±1.22 |
|  | TG (mmol/l) | 1,142(23.78) | 1.37(1.00,1.91) | 1.37(0.99,1.90) |
|  | SCR (umol/l) | 485(10.10) | 72.60(58.00,96.90) | 72.60(58.00,96.58) |
|  | LDL-C (mmol/L) | 1,185(24.68) | 2.42±0.93 | 2.40±0.92 |
|  | HDL-C (mmol/L) | 1,176(24.49) | 1.15±0.35 | 1.15±0.36 |
|  | ALB (g/L) | 555(11.56) | 38.36±5.11 | 38.32±5.14 |
|  | HbA1c (%) | 1,640(34.15) | 8.43±3.37 | 8.33±3.22 |
|  | Fasting glucose (mmol/l) | 756(15.74) | 8.10(6.14,11.26) | 8.08(6.12,11.30) |
| **External validation set** | SBP (mmHg) | 92(6.50) | 142.1±23.9 | 141.92±23.77 |
|  | DBP (mmHg) | 92(6.50) | 78.76±13.19 | 78.64±13.22 |
|  | TC (mmol/l) | 515(36.37) | 4.32±1.29 | 4.32±1.26 |
|  | TG (mmol/l) | 514(36.30) | 1.37(0.96,1.99) | 1.35(0.93,1.96) |
|  | SCR (umol/l) | 91(6.43) | 74.14(60.59,95.21) | 74.01(60.39,95.13) |
|  | LDL-C (mmol/L) | 514(36.30) | 2.5±0.97 | 2.49±0.93 |
|  | HDL-C (mmol/L) | 514(36.30) | 1.22±0.34 | 1.24±0.36 |
|  | ALB (g/L) | 92(6.50) | 39.99±5.37 | 39.98±5.38 |
|  | HbA1c (%) | 351(24.79) | 8.14±2.66 | 8.14±2.68 |
|  | Fasting glucose (mmol/l) | 397(28.04) | 8.34(6.63,11.74) | 8.30(6.66,11.76) |

*SBP: systolic blood pressure; DBP: diastolic blood pressure; TC: total cholesterol; TG: triglycerides; SCR: serum levels of creatinine; LDL-C: low-density lipoprotein cholesterol; HDL-C: high-density lipoprotein cholesterol; ALB: albumin; HbA1c: glycated hemoglobin.*

**Table S5. Complete case sensitivity analysis**

|  | **Missing variables** | **Survival group** | **Death group** | ***P*Multiple imputation** | **Survival group** | **Death group** | ***P*Complete case** |
| --- | --- | --- | --- | --- | --- | --- | --- |
| **Training set** | SBP (mmHg) | 139.94±22.14 | 133.33±25.70 | <0.001 | 141.33±22.32 | 137.25±26.64 | <0.001 |
|  | DBP (mmHg) | 77.63±12.11 | 74.41±15.20 | <0.001 | 77.87±12.22 | 74.71±16.03 | <0.001 |
|  | TC (mmol/l) | 4.34±1.24 | 4.02±1.33 | <0.001 | 4.36±1.27 | 3.87±1.40 | <0.001 |
|  | TG (mmol/l) | 1.38(1.00,1.96) | 1.19(0.92,1.72) | <0.001 | 1.40(1.01,1.98) | 1.18(0.88,1.62) | <0.001 |
|  | SCR (umol/l) | 71.40(57.40,93.90) | 97.80(68.20,167.10) | <0.001 | 71.00(57.00,93.40) | 105.90(74.80,179.05) | <0.001 |
|  | LDL-C (mmol/L) | 2.40±0.93 | 2.28±1.00 | 0.006 | 2.40±0.94 | 2.07±0.95 | <0.001 |
|  | HDL-C (mmol/L) | 1.15±0.35 | 0.96±0.36 | <0.001 | 1.18±0.36 | 0.99±0.35 | <0.001 |
|  | ALB (g/L) | 38.54±5.04 | 32.72±5.87 | <0.001 | 38.95±4.73 | 34.06±5.53 | <0.001 |
|  | HbA1c (%) | 8.31±3.43 | 7.79±3.25 | <0.001 | 8.27±2.90 | 7.80±2.14 | 0.020 |
|  | Fasting glucose (mmol/l) | 8.00(6.14,11.28) | 8.22(6.04,11.75) | 0.733 | 8.26(6.30,11.79) | 8.70(6.52,11.92) | 0.406 |
| **Internal validation set** | SBP (mmHg) | 139.64±21.33 | 133.10±23.15 | <0.001 | 140.75±21.25 | 134.90±23.78 | <0.001 |
|  | DBP (mmHg) | 77.80±12.10 | 74.75±12.78 | 0.003 | 77.79±12.02 | 73.79±12.95 | 0.033 |
|  | TC (mmol/l) | 4.33±1.22 | 3.85±1.18 | <0.001 | 4.37±1.20 | 3.88±0.87 | 0.001 |
|  | TG (mmol/l) | 1.37(1.00,1.90) | 1.20(0.92,1.94) | 0.093 | 1.38(1.00,1.94) | 1.18(0.98,1.75) | 0.193 |
|  | SCR (umol/l) | 72.00(57.90,95.38) | 90.90(67.10,149.35) | <0.001 | 72.00(57.40,93.40) | 91.80(66.30,132.75) | <0.001 |
|  | LDL-C (mmol/L) | 2.41±0.92 | 2.04±0.85 | <0.001 | 2.43±0.90 | 2.14±0.77 | 0.025 |
|  | HDL-C (mmol/L) | 1.15±0.35 | 1.01±0.43 | <0.001 | 1.18±0.35 | 1.08±0.34 | <0.001 |
|  | ALB (g/L) | 38.47±5.05 | 33.25±5.43 | <0.001 | 38.93±4.62 | 34.31±5.10 | <0.001 |
|  | HbA1c (%) | 8.34±3.24 | 7.95±2.61 | 0.157 | 8.27±2.55 | 7.72±2.48 | 0.165 |
|  | Fasting glucose (mmol/l) | 8.06(6.11,11.20) | 9.22(6.41,13.42) | 0.027 | 8.30(6.31,11.72) | 8.67(6.23,12.49) | 0.047 |
| **External validation set** | SBP (mmHg) | 142.25±23.72 | 121.87±18.30 | <0.001 | 144.31±24.56 | 118.75±12.74 | 0.038 |
|  | DBP (mmHg) | 78.80±13.21 | 68.96±9.53 | <0.001 | 79.54±13.43 | 67.50±6.61 | 0.034 |
|  | TC (mmol/l) | 4.32±1.25 | 4.50±1.39 | 0.492 | 4.41±1.32 | 3.82±1.05 | 0.370 |
|  | TG (mmol/l) | 1.36(0.93,1.95) | 1.33(0.82,2.44) | 0.961 | 1.40(0.96,2.00) | 1.02(0.95,1.13) | 0.188 |
|  | SCR (umol/l) | 73.96(60.35,94.83) | 81.48(65.95,156.55) | 0.059 | 74.97(61.11,92.06) | 137.55(115.60,148.83) | 0.074 |
|  | LDL-C (mmol/L) | 2.49±0.93 | 2.40±0.92 | 0.655 | 2.56±0.98 | 1.97±0.73 | 0.233 |
|  | HDL-C (mmol/L) | 1.24±0.36 | 1.38±0.54 | 0.210 | 1.23±0.33 | 1.15±0.30 | 0.605 |
|  | ALB (g/L) | 40.09±5.28 | 33.55±7.02 | <0.001 | 40.93±4.69 | 31.65±5.50 | <0.001 |
|  | HbA1c (%) | 8.14±2.68 | 7.75±2.67 | 0.487 | 8.02±2.30 | 6.33±0.68 | 0.141 |
|  | Fasting glucose (mmol/l) | 8.30(6.65,11.76) | 10.01(7.30,12.91) | 0.293 | 8.00(6.53,11.11) | 5.73(3.93,8.13) | 0.138 |

*SBP: systolic blood pressure; DBP: diastolic blood pressure; TC: total cholesterol; TG: triglycerides; SCR: serum levels of creatinine; LDL-C: low-density lipoprotein cholesterol; HDL-C: high-density lipoprotein cholesterol; ALB: albumin; HbA1c: glycated hemoglobin.*

**Table S6. Comparison of Model Performance**

|  | **AUROC (95%CI)** | ***P* value** | **NRI (95%CI)** | ***P* value** |
| --- | --- | --- | --- | --- |
| Munsakul et al. model | 0.710 (0.684-0.736) | < 0.001 | 0.112 (0.054-0.171) | < 0.001 |
| Liu et al. model | 0.701 (0.674-0.729) | < 0.001 | 0.141 (0.062-0.221) | < 0.001 |
| Our model | 0.873 (0.857-0.889) | / | / | / |

*AUROC: area under the receiver operating characteristic curve; NRI, net reclassification improvement; CI, confidence interval*

**Figure S1. Patient flow diagram**

**
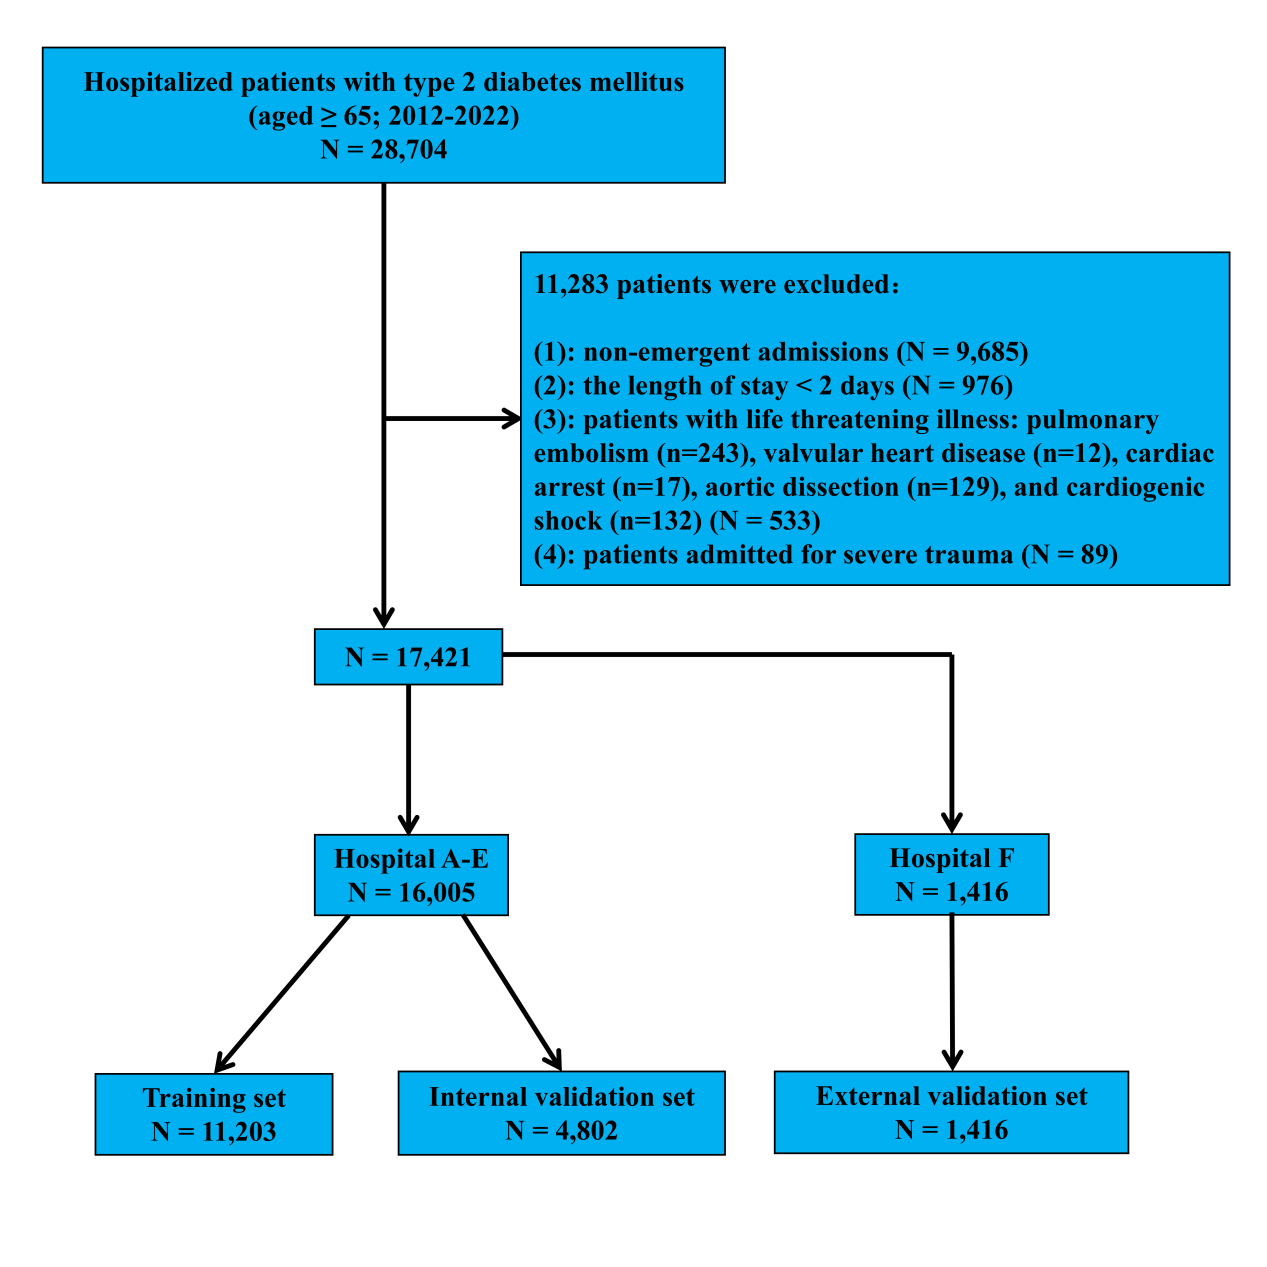
**

**Figure S2. The predictive performance of the model in hypertensive population**

**
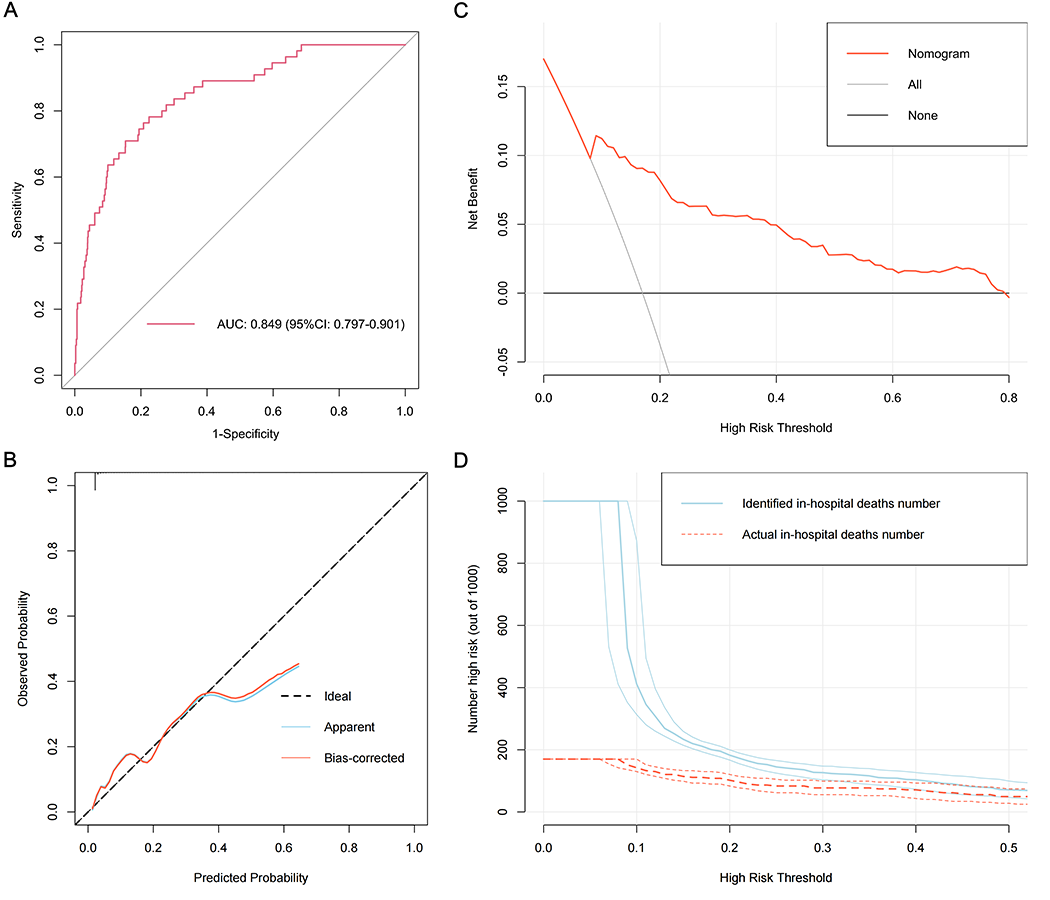
**
